# Supplementary material for: GWAS identifies 14 loci for device-measured physical activity and sleep duration
Source: PubMed Central journal article supplement (PMC6288145; doi:10.1038/s41467-018-07743-4), 2018-12-10

***GWAS identifies 14 loci for device-measured physical activity and sleep duration.***

**Doherty et al.**

**Supplementary Figure 1** | Phenotype face validity check: difference in accelerometer-measured sleep duration classification by self-reported chronotype in 91,105 UK Biobank participants.

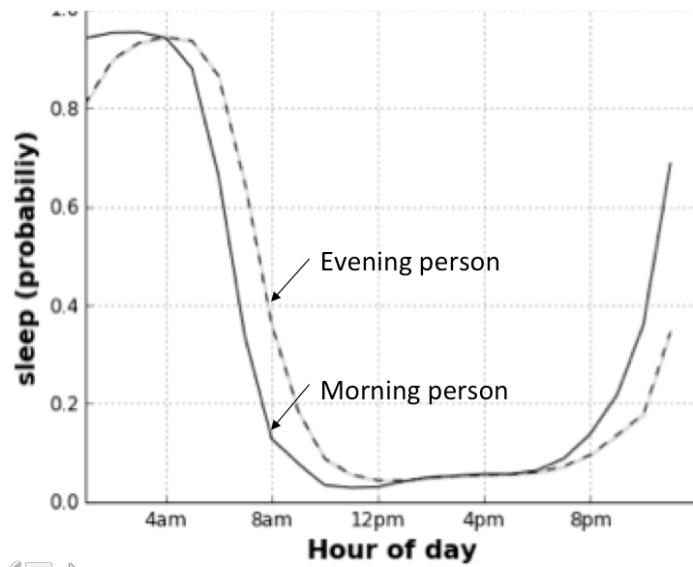

Answer to question on whether participants consider themselves to be:

Definitely an 'evening' person  
(mean age = 62, n=22,070)

Or

Definitely a 'morning' person  
(mean age=60, n=7,895)

**Supplementary Figure 2** | Phenotypic and genetic correlation between traditional ‘overall activity’ metric and four machine-learned phenotypes in 91,105 UK Biobank participants who wore wrist-worn accelerometers.

**Phenotypic correlations**

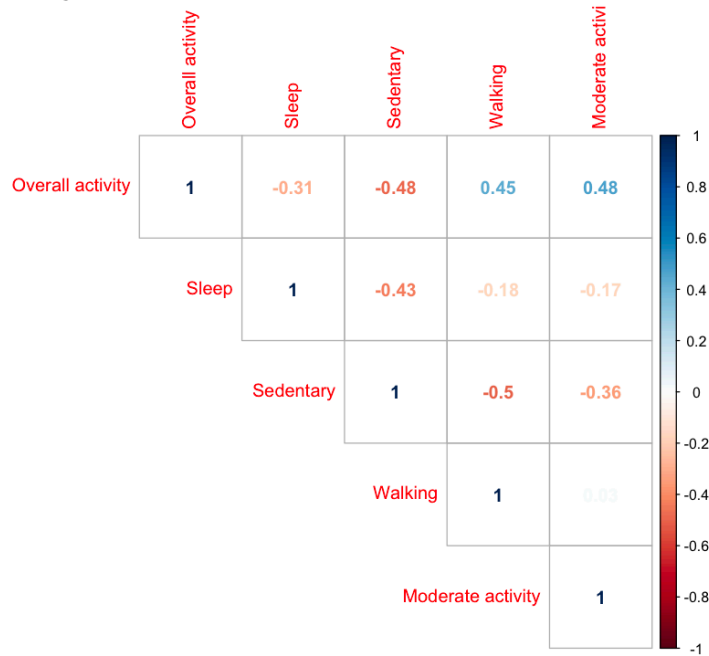

**Genetic correlations**

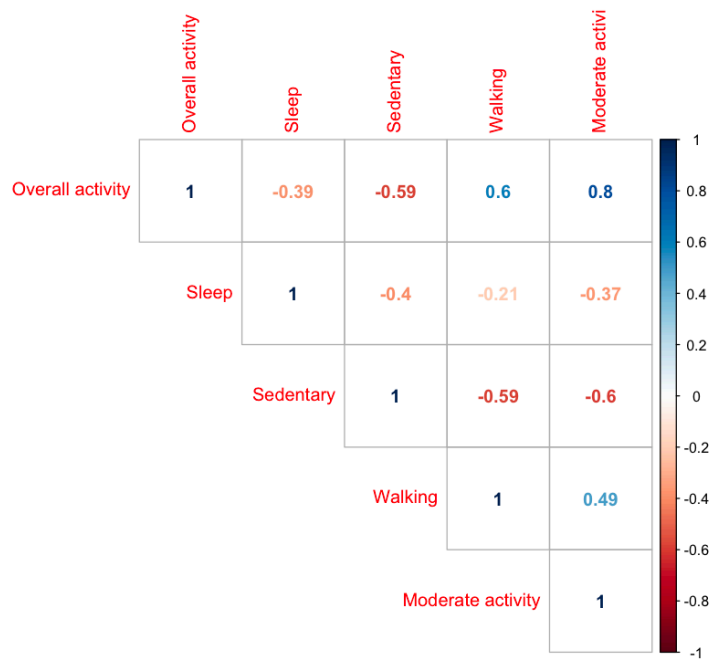

**Supplementary Figure 3** | Summary Manhattan and QQ plots of European sex-combined GWAS of accelerometer-measured physical activity and sleep duration traits: the UK Biobank study 2013-2015 (n = 91,122).

Genomic control ( $\lambda$ ), explained variance ( $R^2$ ) and heritability ( $h^2$ ) estimates are also provided.

**Overall activity:**  $\lambda = 1.20$ , LD intercept = 1.01,  $h^2 = 0.21$ ,  
 $R^2(\text{GWS loci}) = 0.06\%$ ,  $R^2(5 \times 10^{-3} \text{ loci}) = 14.0\%$

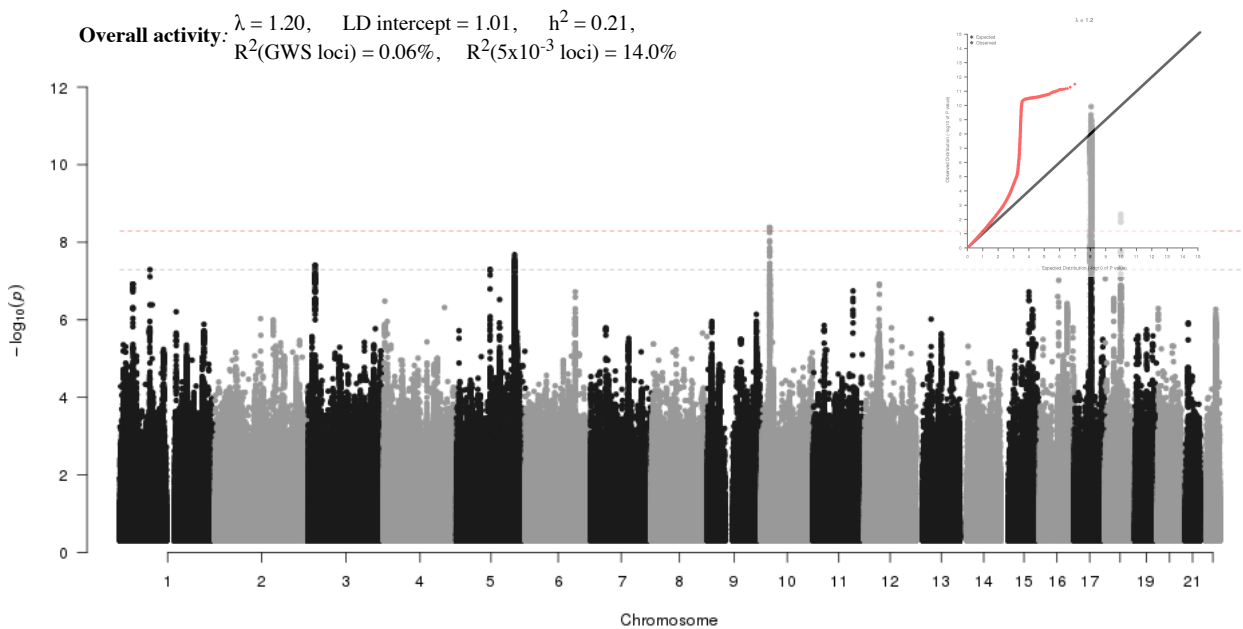

**Sleep duration:**  $\lambda = 1.20$ , LD intercept = 1.01,  $h^2 = 0.19$ ,  
 $R^2(\text{GWS loci}) = 0.33\%$ ,  $R^2(5 \times 10^{-3} \text{ loci}) = 18.1\%$

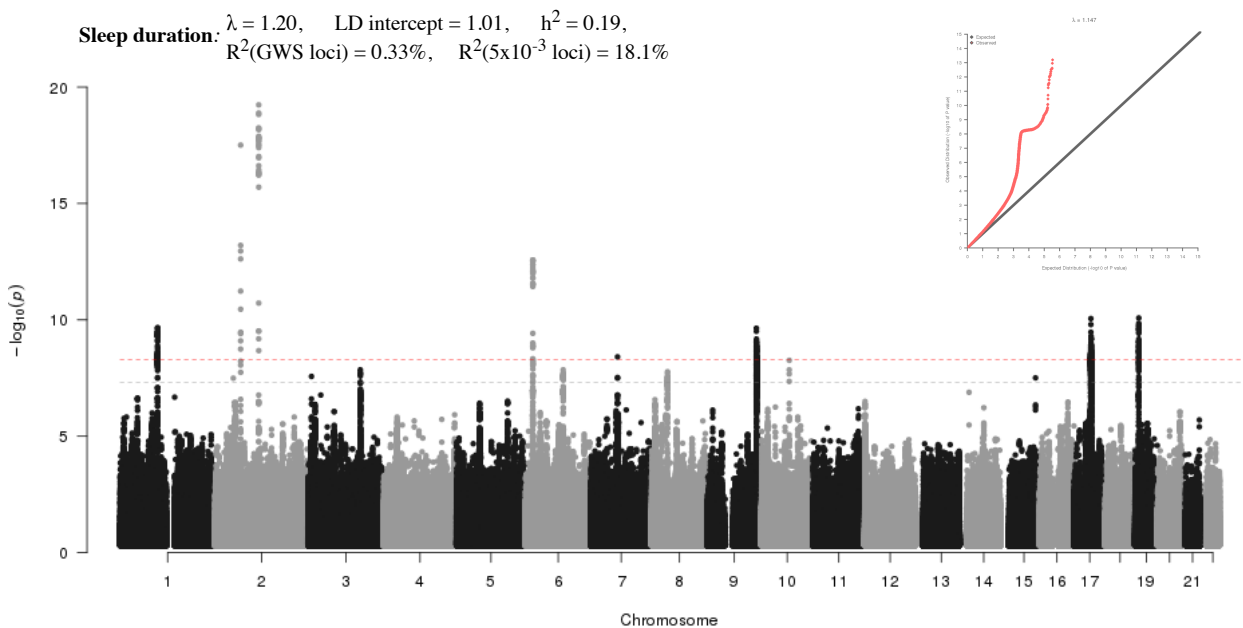

**Sedentary:**  $\lambda = 1.20$ , LD intercept = 0.98,  $h^2 = 0.15$ ,  
 $R^2(\text{GWS loci}) = 0.08\%$ ,  $R^2(5 \times 10^{-3} \text{ loci}) = 12.9\%$

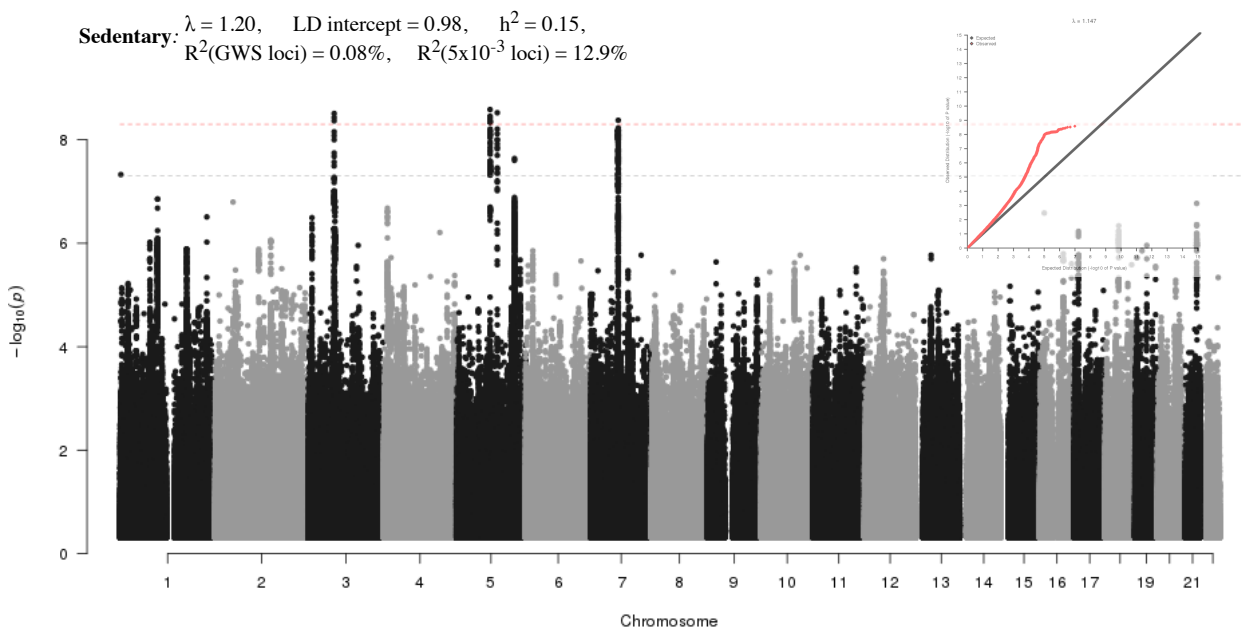

**Walking:**  $\lambda = 1.15$ , LD intercept = 1.00,  $h^2 = 0.12$ ,  
 $R^2(\text{GWS loci}) = \text{nan\%}$ ,  $R^2(5 \times 10^{-3} \text{ loci}) = 16.4\%$

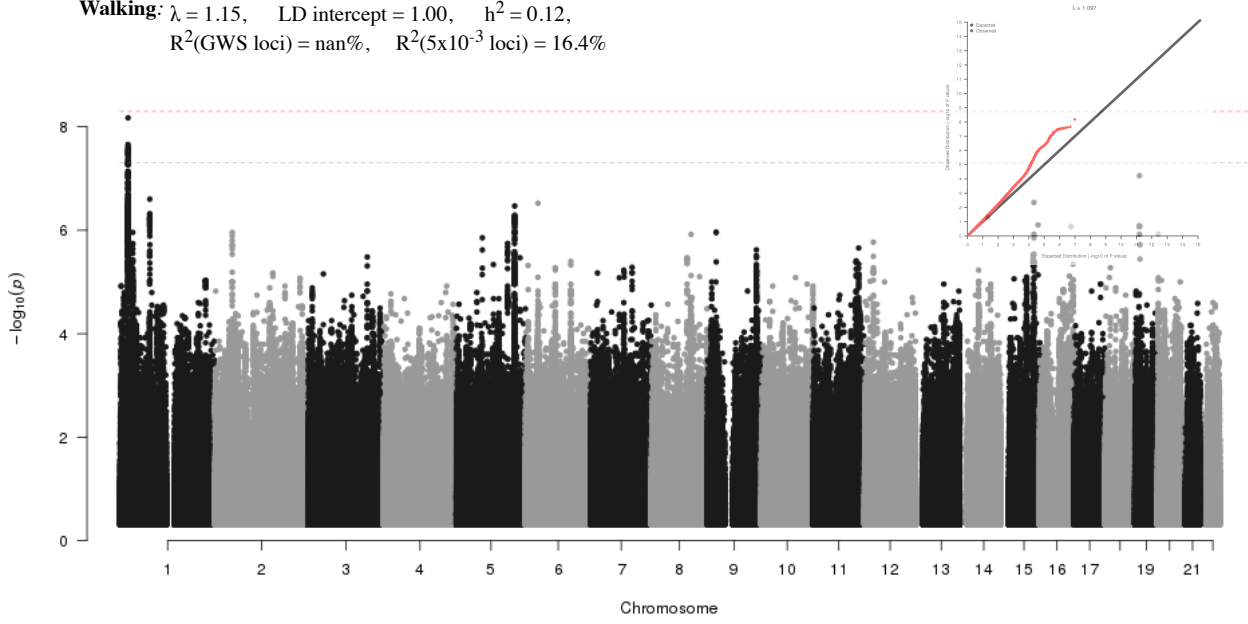

**Moderate intensity activity:**  $\lambda = 1.10$ , LD intercept = 1.02,  $h^2 = 0.10$ ,  
 $R^2(\text{GWS loci}) = \text{nan\%}$ ,  $R^2(5 \times 10^{-3} \text{ loci}) = 14.5\%$

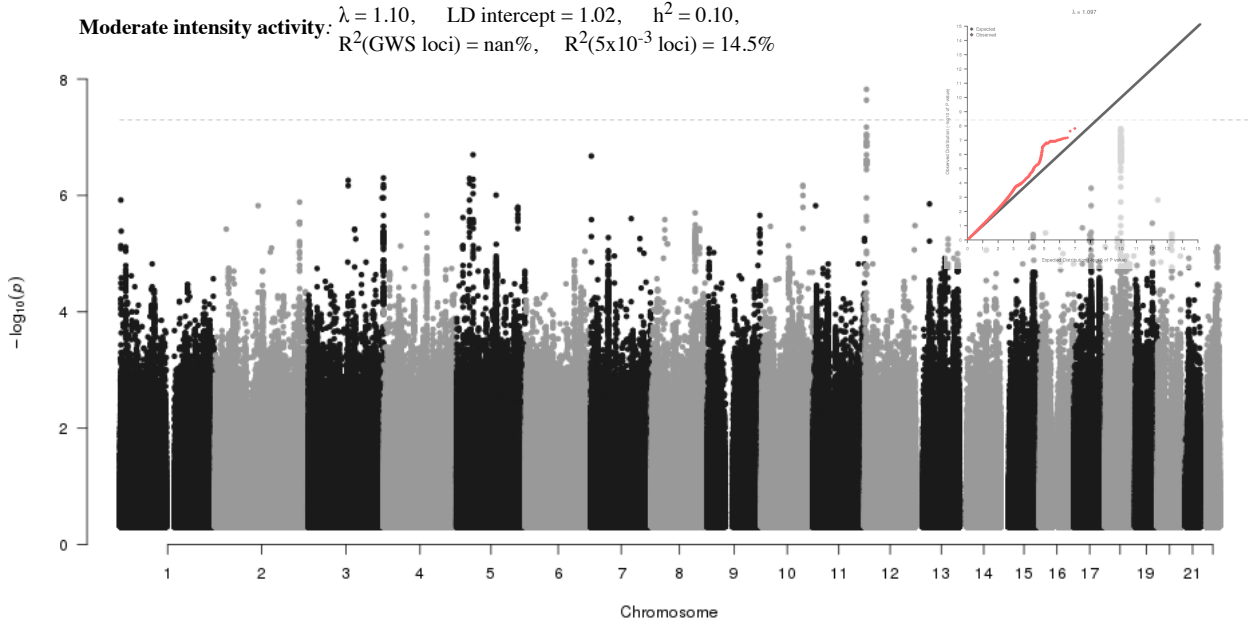

**Supplementary Figure 4 | Regional association plots for genome-wide significant loci associated with accelerometer-measured physical activity and sleep duration traits in 91,105 UK Biobank participants.**

A. Regional plots for novel loci. B. Regional plots for previously identified loci. Nearest gene is labelled at the top of each plot.

**Overall activity**

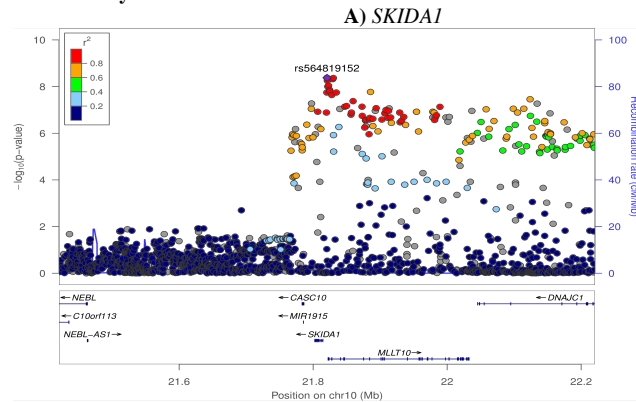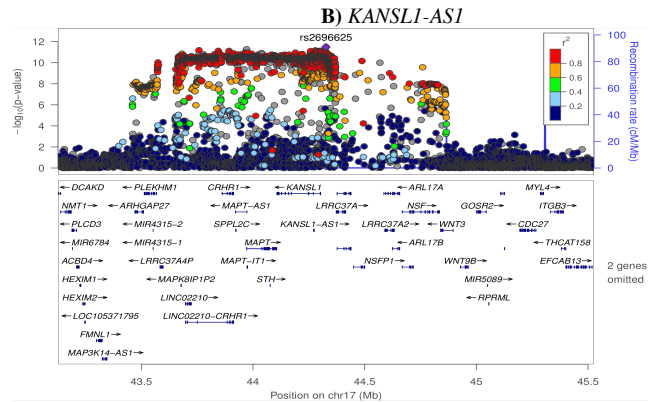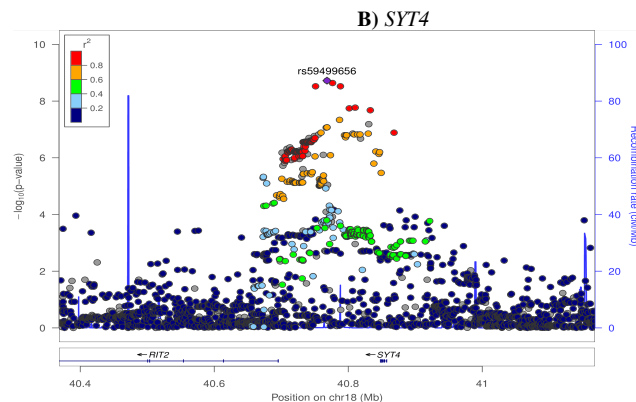

**Sleep duration**

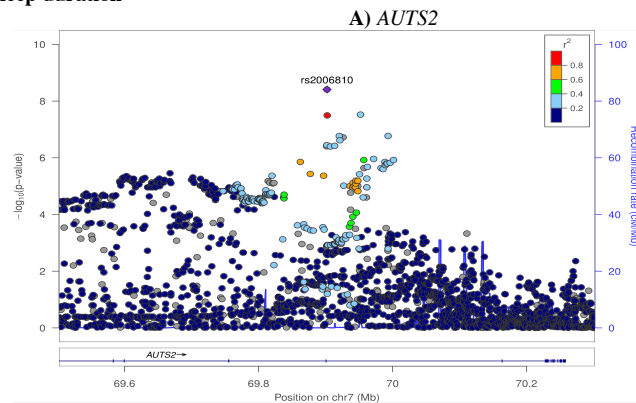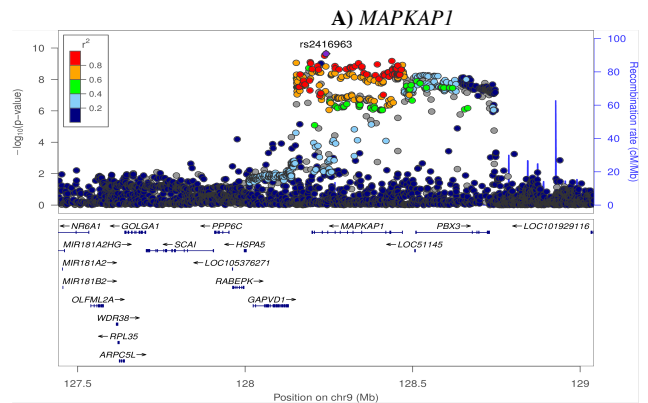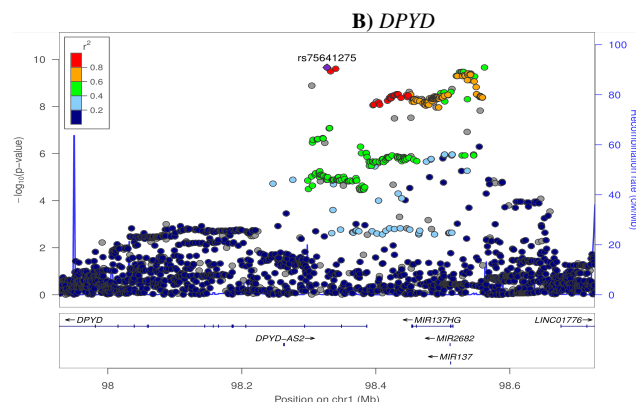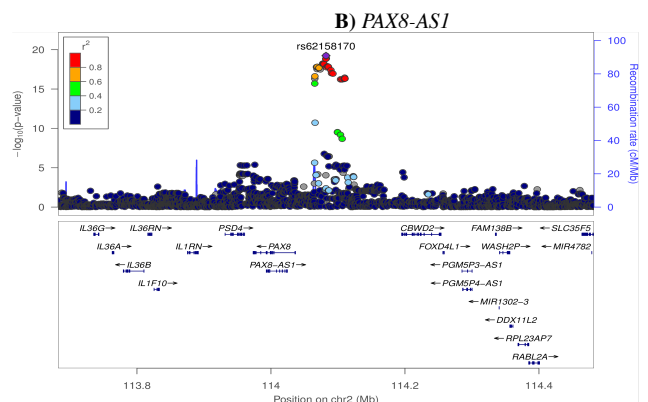

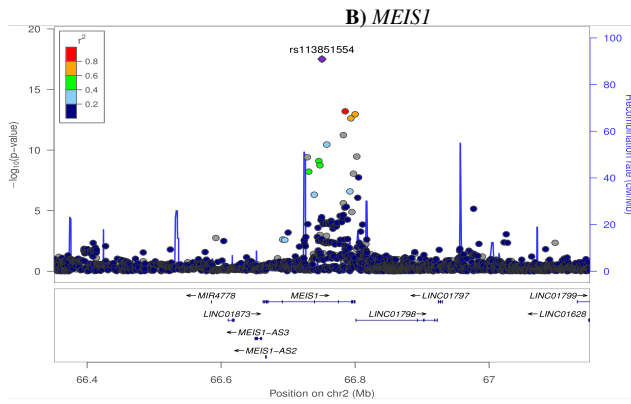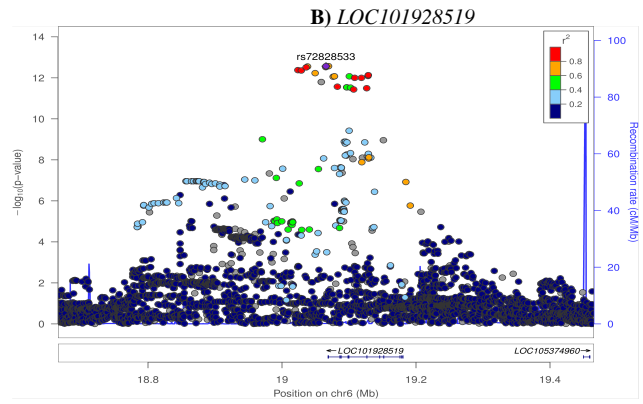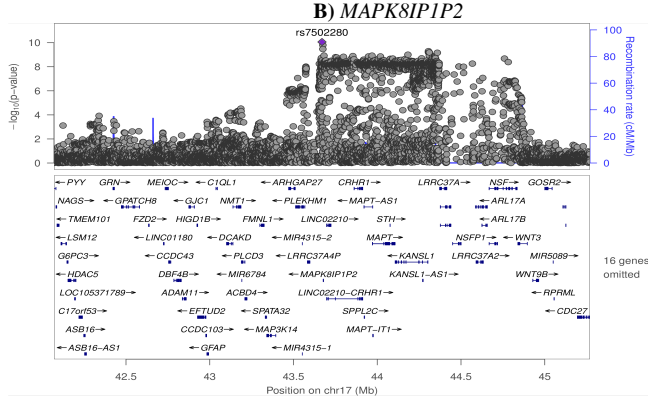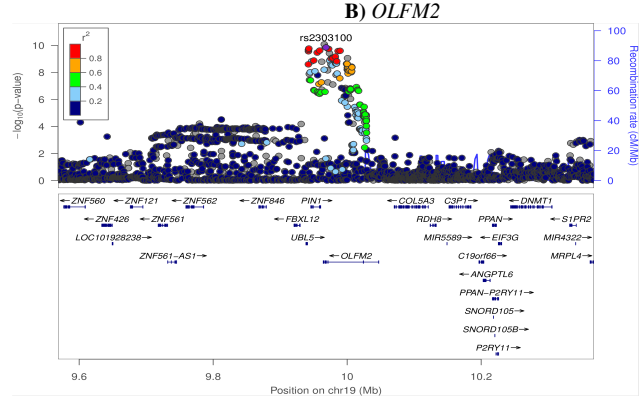

**Sedentary**

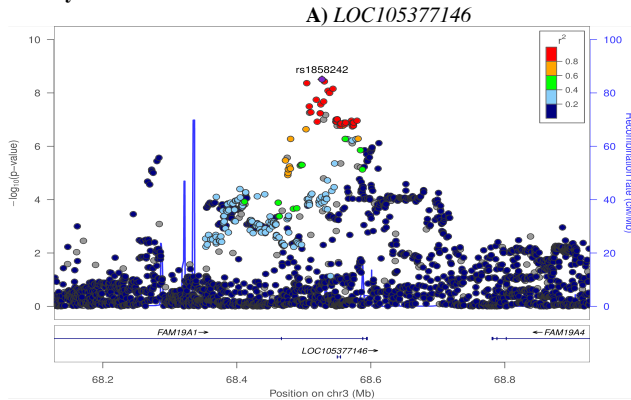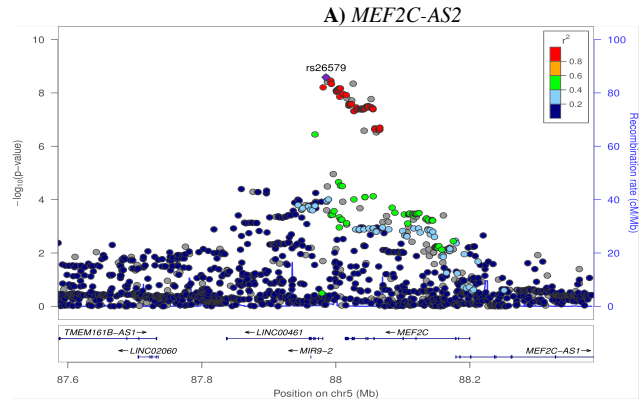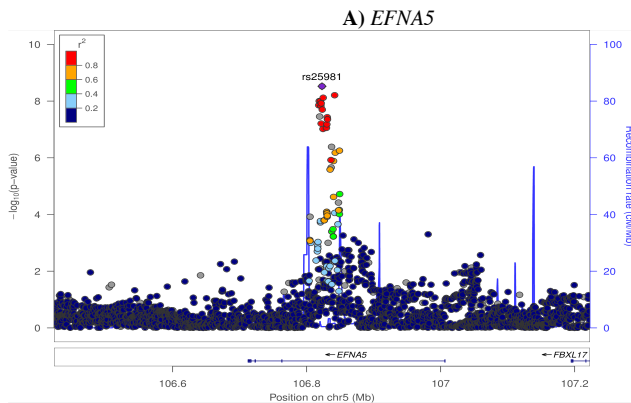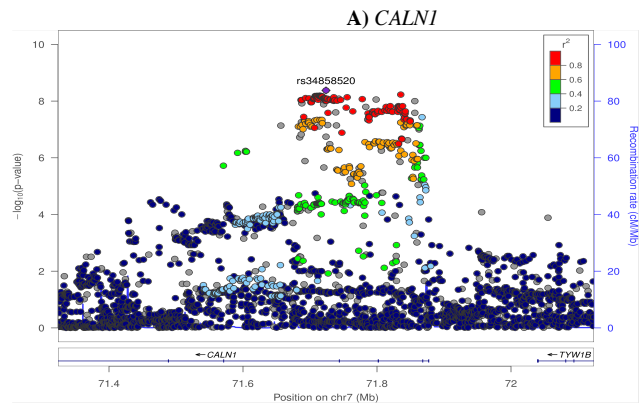

**Supplementary Figure 5** Heritability partitioning enrichment estimates across functional categories and tissues for accelerometer-measured physical activity and sleep duration traits in 91,105 UK Biobank participants.

Error bars represent 95% confidence intervals around the estimate, proportion of SNPs indicated in x-axis label parentheses. Annotated categories indicate annotations or tissues that pass the multiple testing significance threshold ( $p < 4.76 \times 10^{-4}$  for functional annotations,  $p < 1 \times 10^{-3}$  for cell types).

**Overall activity**

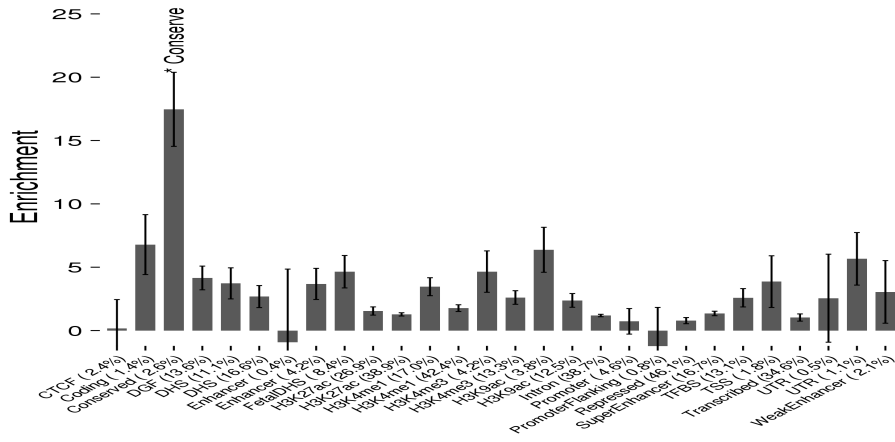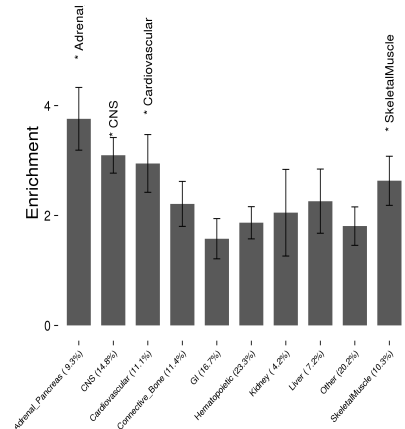

**Sleep duration**

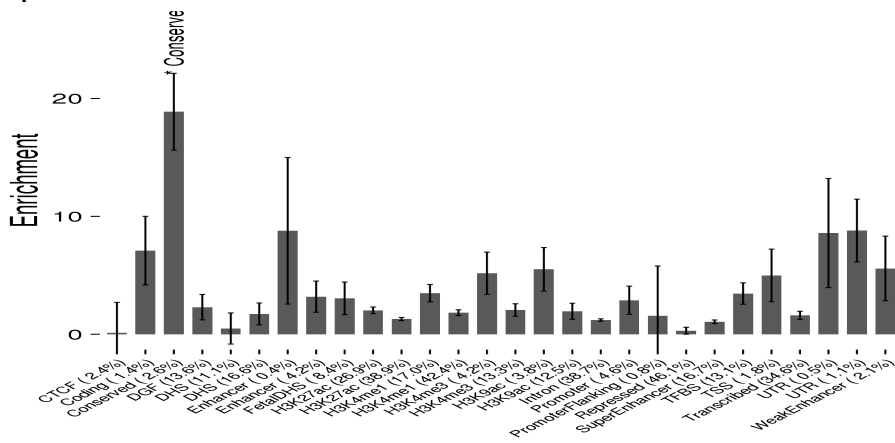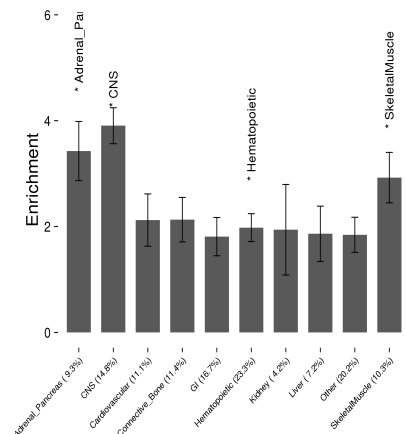

**Sedentary**

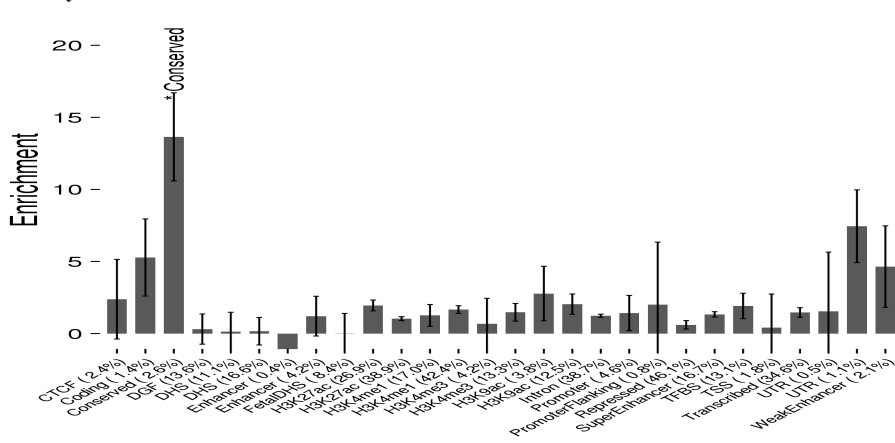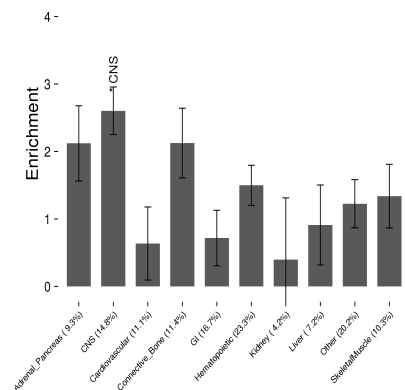



## Walking

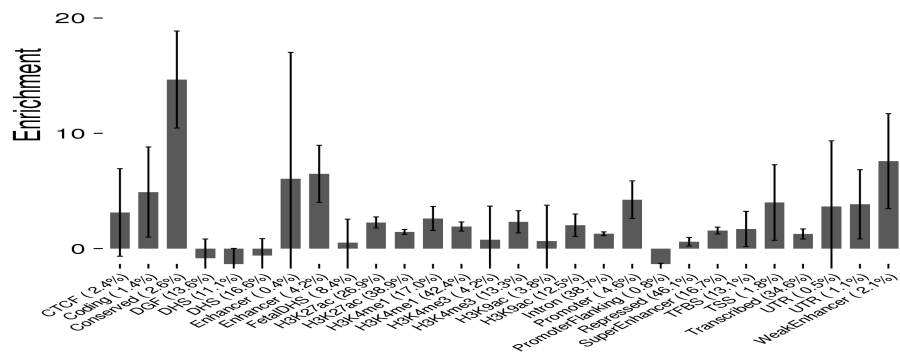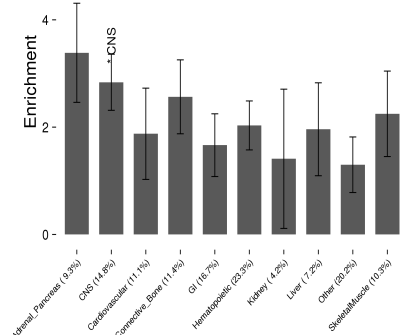

## Moderate intensity activity

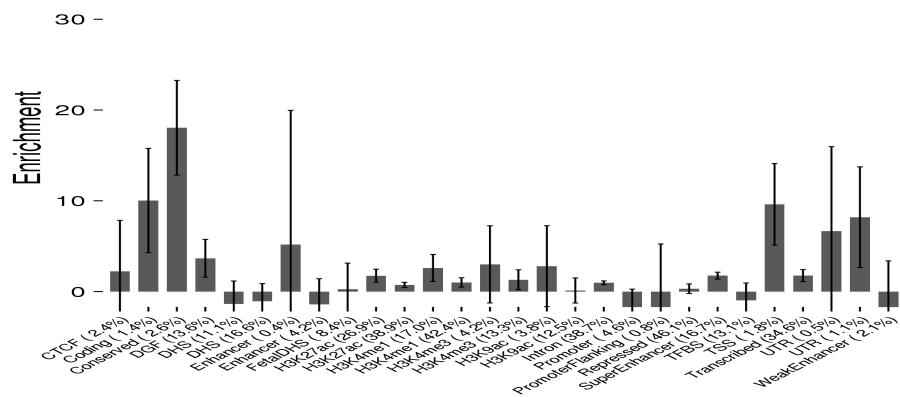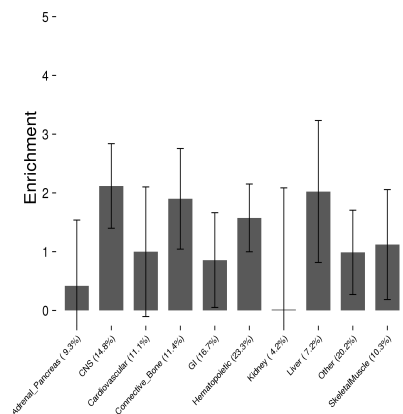

**Supplementary Figure 6 |** Summary Miami and QQ plots of European sex-specific analysis of accelerometer-measured physical activity and sleep duration traits (39,968 men, 51,137 women).

Miami plot of association statistics ( $-\log_{10}(P \text{ values})$ ) for women on the positive y-axis and men on the negative y-axis. Quantile-quantile plot of SNP associations stratified by sex. Genomic control ( $\lambda$ ), explained variance ( $R^2$ ) and heritability ( $h^2$ ) estimates are also provided.

**Overall activity:**  $\lambda(m) = 1.1$ ,  $LD \alpha(m) = 1.0$ ,  $h^2(m) = 0.2$ ,  $R^2(5 \times 10^{-7} \text{ hits } m) = 0.0\%$   
 $R_g = 0.98$   $\lambda(w) = 1.15$ ,  $LD \alpha(w) = 1.02$ ,  $h^2(w) = 0.23$   $R^2(5 \times 10^{-7} \text{ hits } f) = 0.03\%$

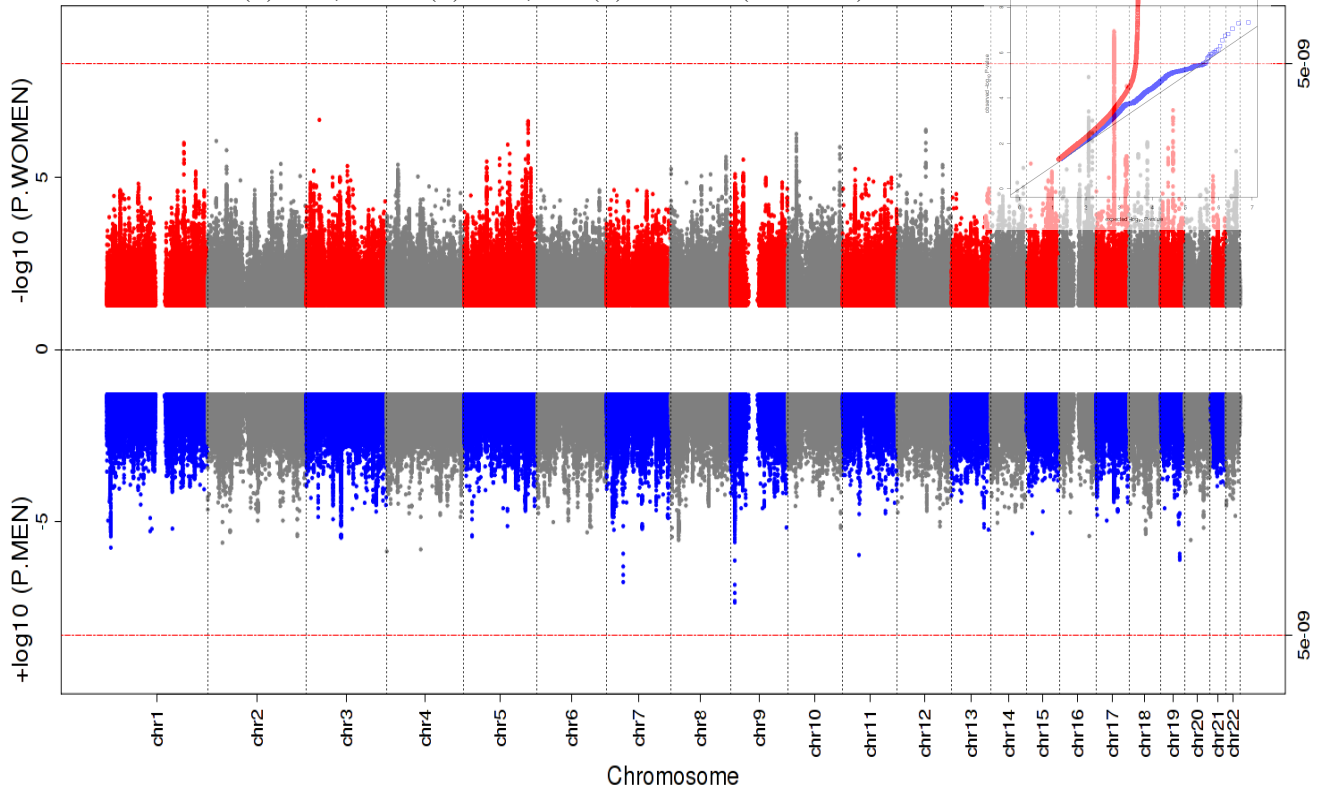

**Sleep duration:**  $\lambda(m) = 1.1$ ,  $LD \alpha(m) = 1.01$ ,  $h^2(m) = 0.2$ ,  $R^2(5 \times 10^{-7} \text{ hits } m) = 0.26\%$   
 $R_g = 0.96$   $\lambda(w) = 1.1$ ,  $LD \alpha(w) = 1.0$ ,  $h^2(w) = 0.19$   $R^2(5 \times 10^{-7} \text{ hits } f) = 0.15\%$

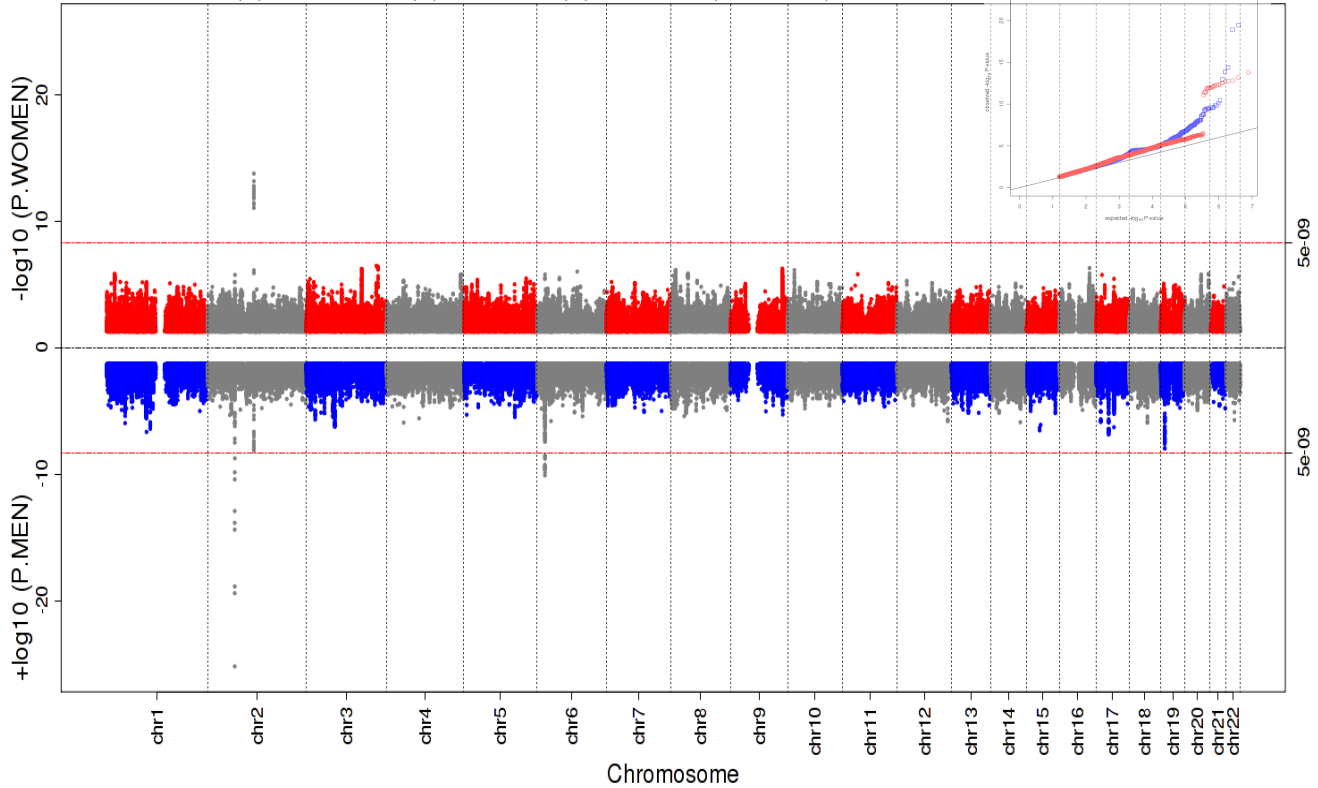

**Sedentary:**  $\lambda(m) = 1.1$ ,  $LD \alpha(m) = 1.0$ ,  $h^2(m) = 0.15$ ,  $R^2(5 \times 10^{-7} \text{hits } m) = 0.05\%$   
 $R_g = 0.94$   $\lambda(w) = 1.1$ ,  $LD \alpha(w) = 1.0$ ,  $h^2(w) = 0.18$ ,  $R^2(5 \times 10^{-7} \text{hits } f) = 0.01\%$

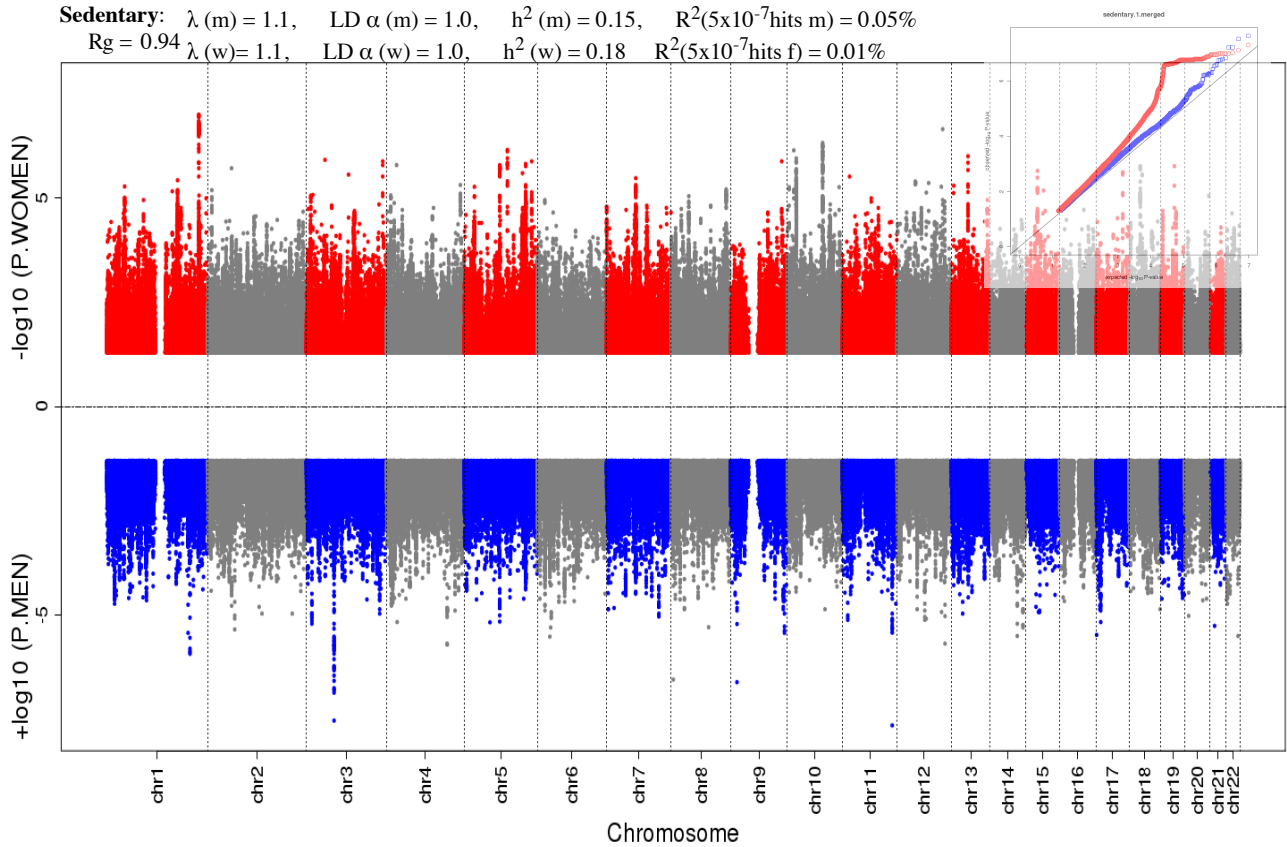

**Walking:**  $\lambda(m) = 1.05$ ,  $LD \alpha(m) = 1.0$ ,  $h^2(m) = 0.13$ ,  $R^2(5 \times 10^{-7} \text{hits } m) = 0.0\%$   
 $R_g = 0.97$   $\lambda(w) = 1.05$ ,  $LD \alpha(w) = 1.01$ ,  $h^2(w) = 0.12$ ,  $R^2(5 \times 10^{-7} \text{hits } f) = 0.06\%$

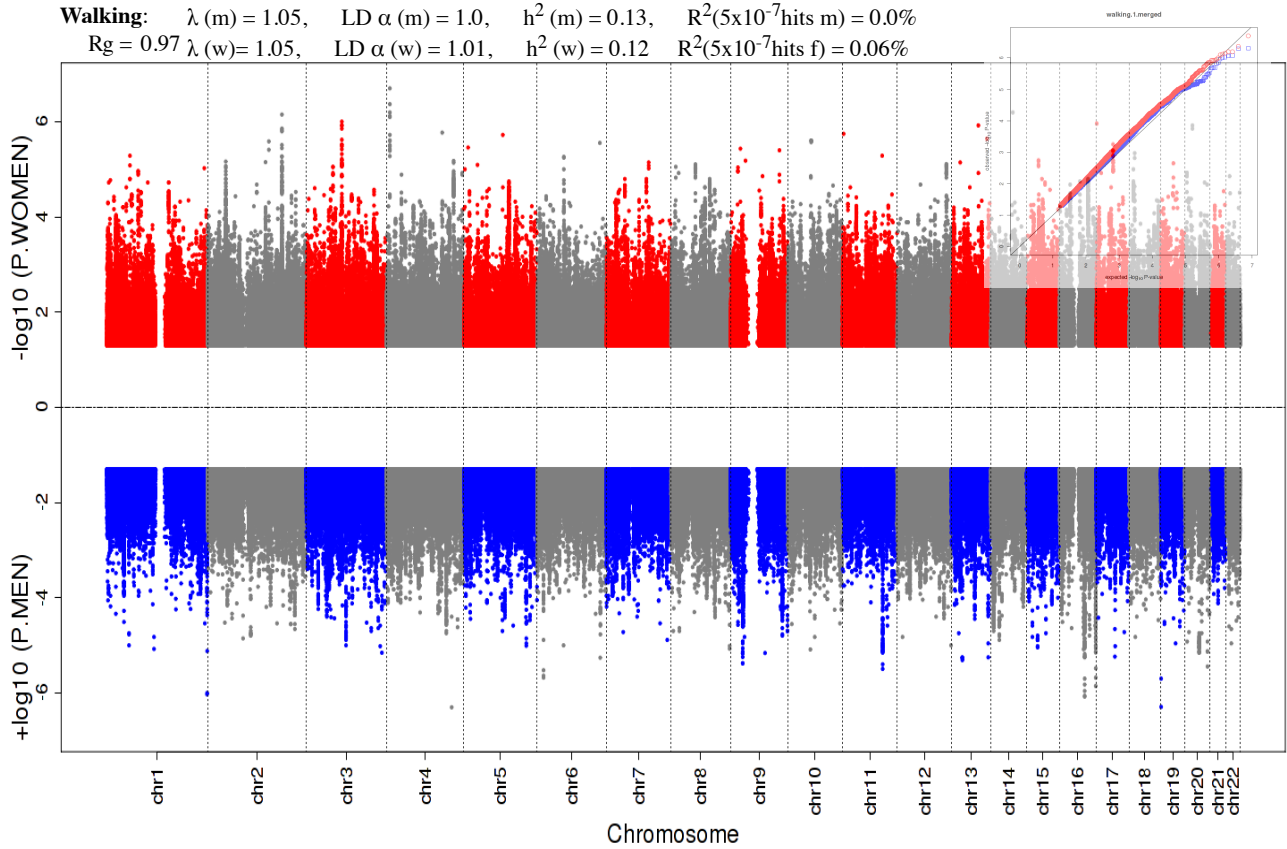

Moderate intensity activity:  $\lambda(m) = 1.05$ ,  $LD \alpha(m) = 1.0$ ,  $h^2(m) = 0.1$ ,  $R^2(5 \times 10^{-7} \text{ hits } m) = 0.01\%$   
 $R_g = 0.93$   $\lambda(w) = 1.05$ ,  $LD \alpha(w) = 1.03$ ,  $h^2(w) = 0.1$ ,  $R^2(5 \times 10^{-7} \text{ hits } f) = 0.02\%$

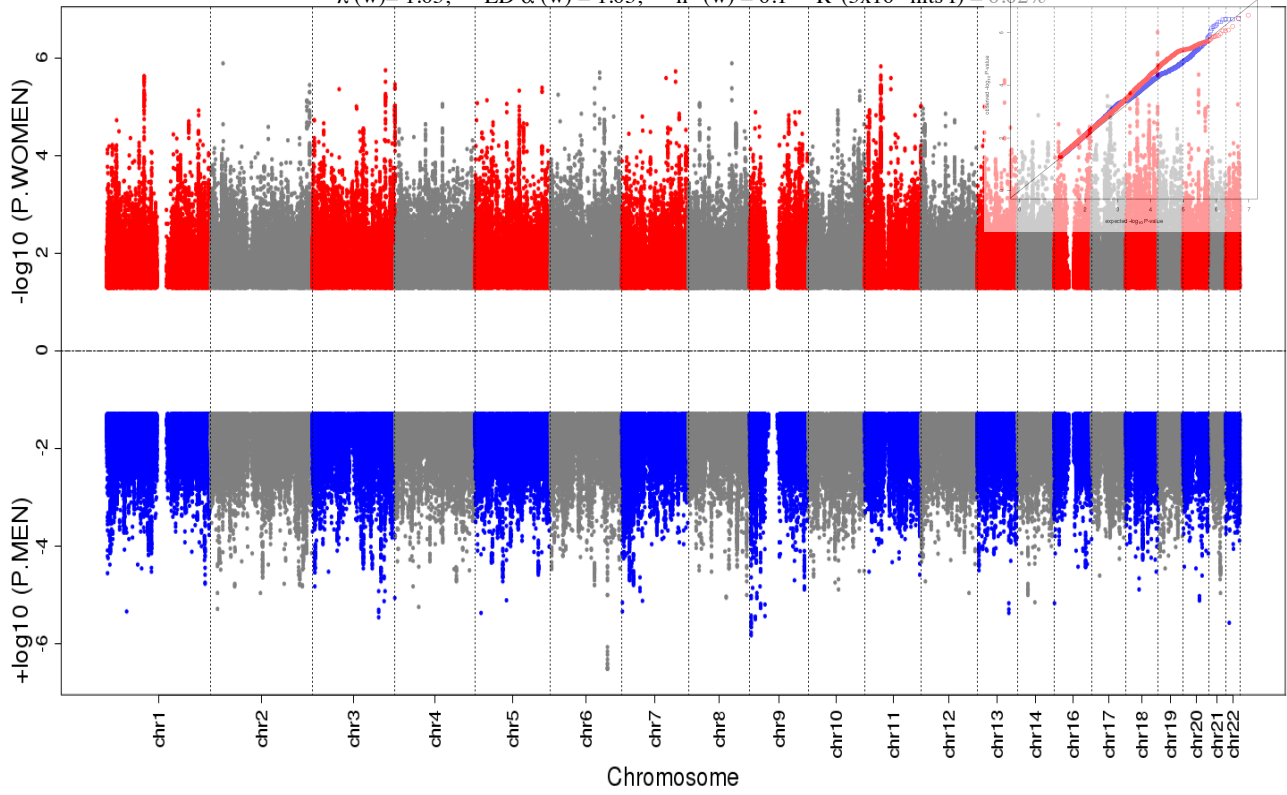

**Supplementary Figure 7** | Effect of p-value threshold for instrument selection on presence of detectable horizontal pleiotropy.  
*Boxplot represents 90 tests for five accelerometer exposure traits assessed against 18 outcomes in 278,374 UK Biobank participants who were not in the accelerometer discovery GWAS.*

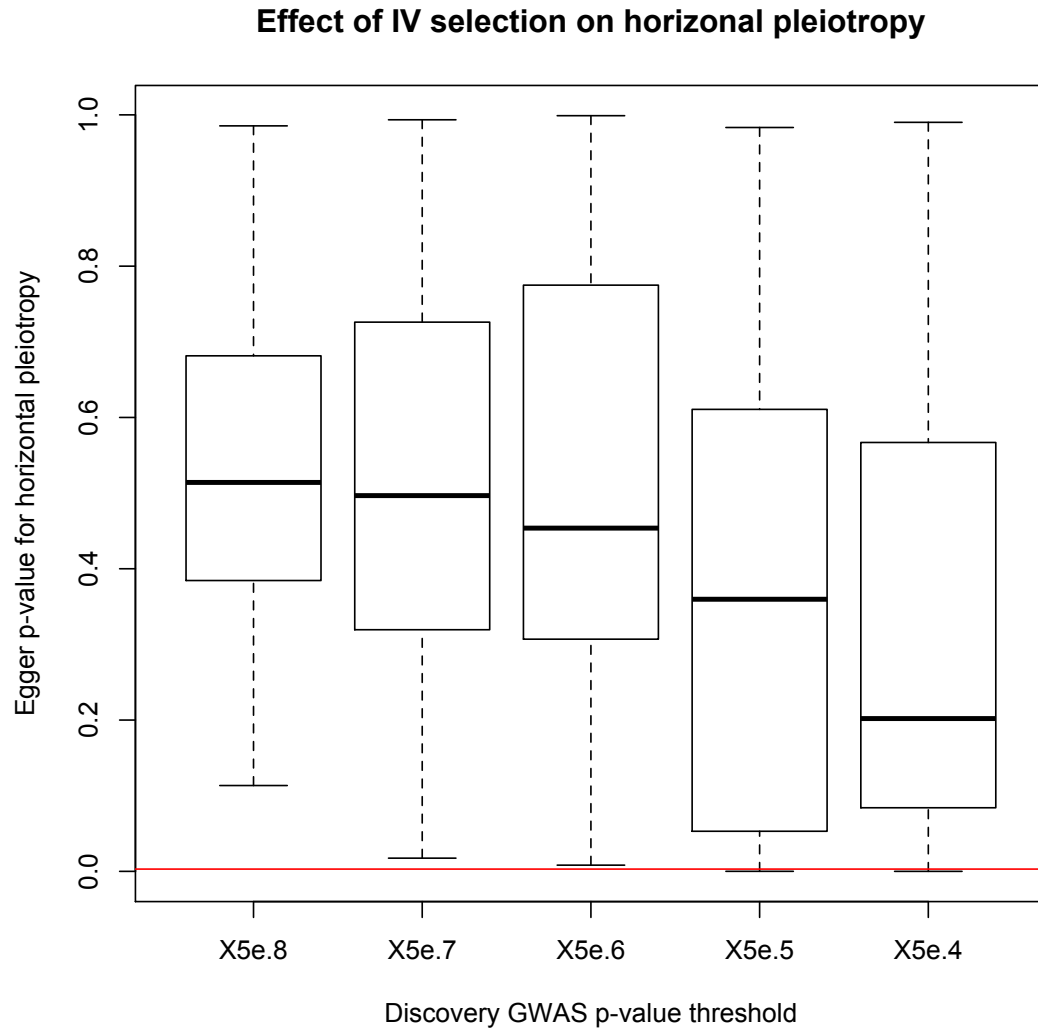

**Supplementary Figure 8** | Mendelian randomisation leave-one-out and single-SNP-only sensitivity analyses for traits suggesting evidence of causality, colour-coded by p-value for instrument variable in discovery GWAS.

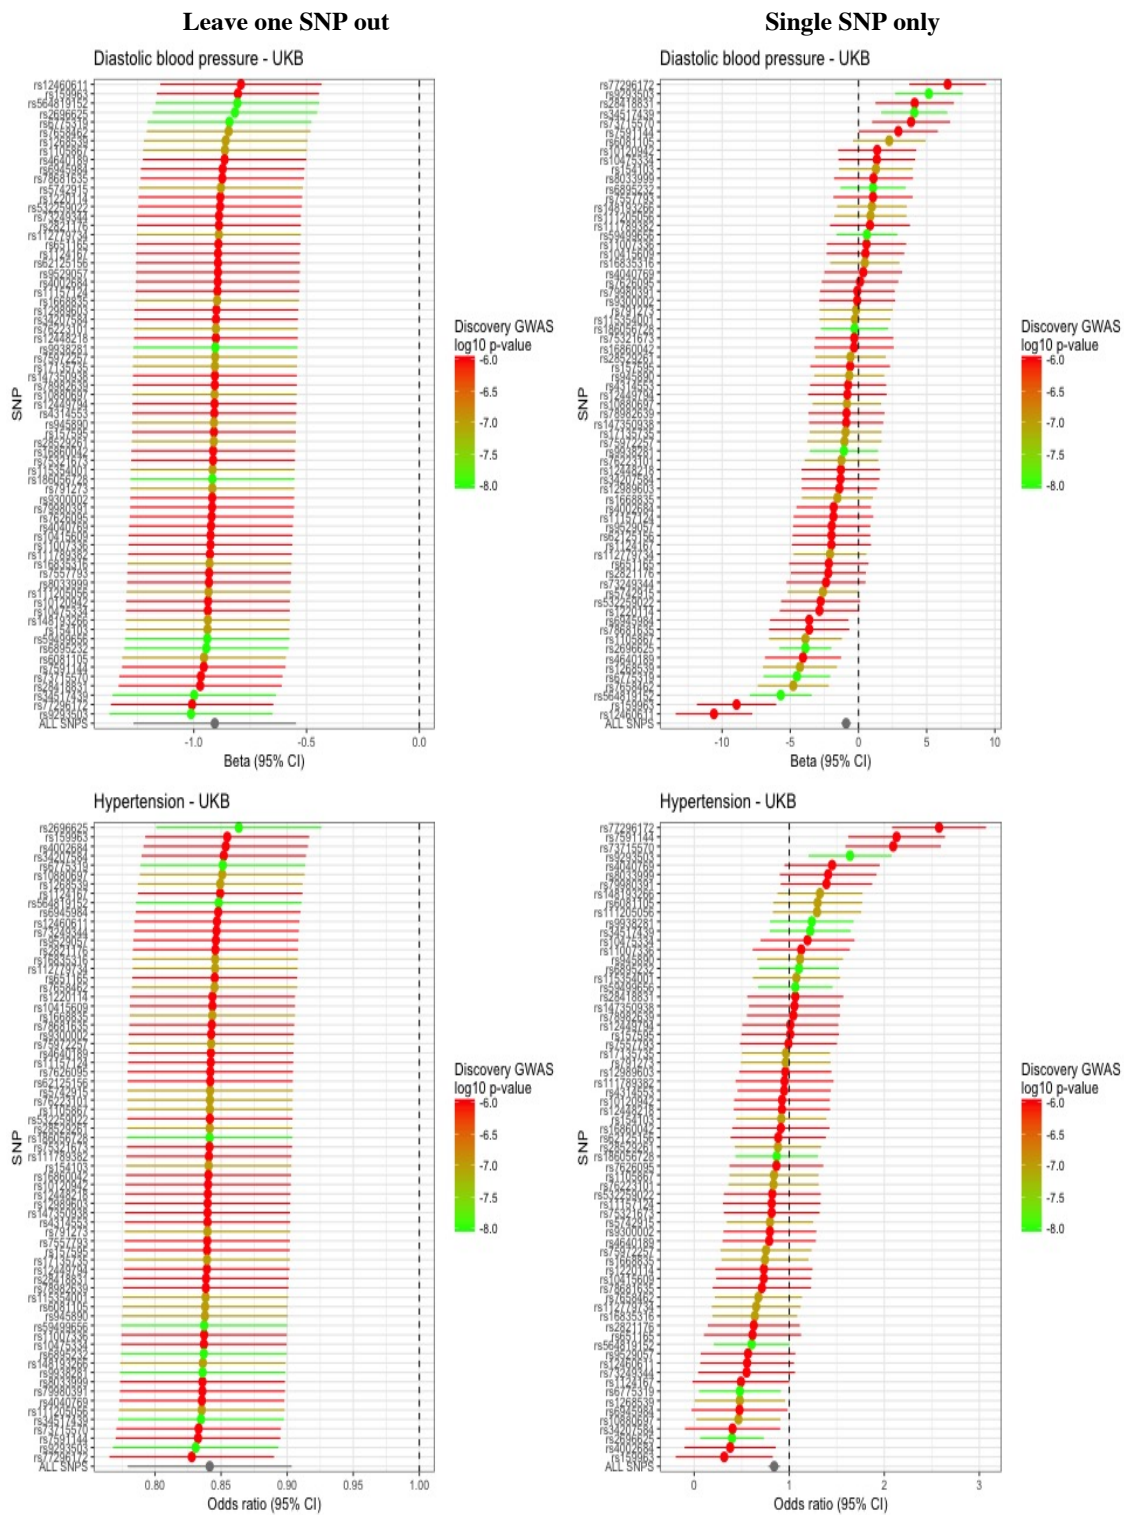

### Leave one SNP out

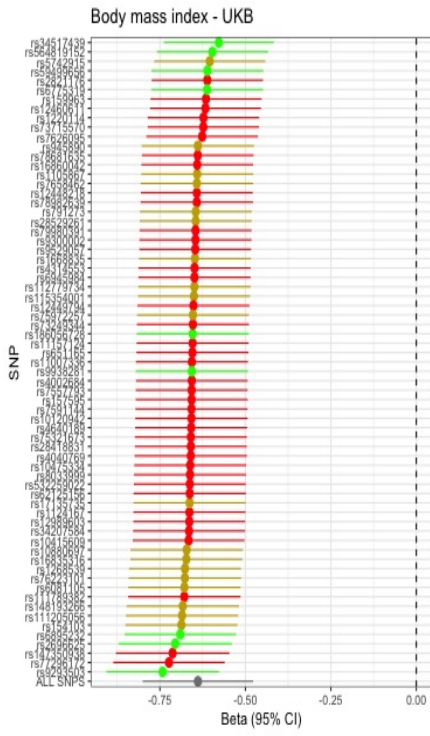

### Single SNP only

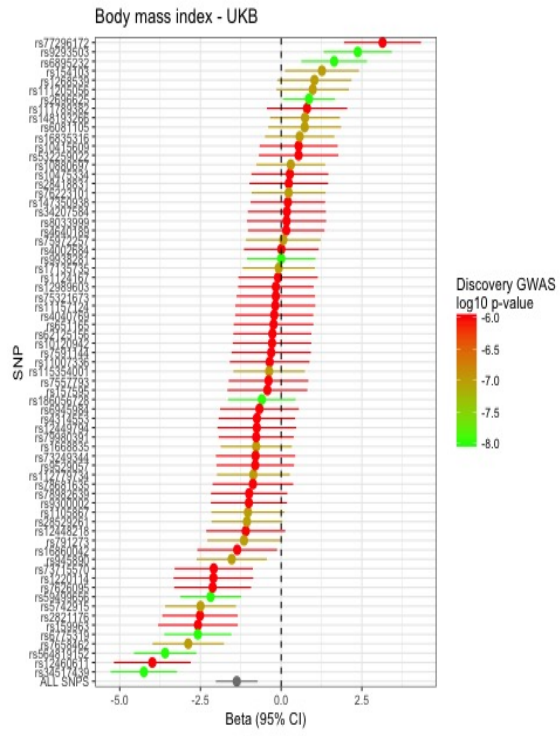

**Supplementary Figure 9** | Tissue enrichment analysis using eQTL data from GTEx for accelerometer-measured traits in 91,105 UK Biobank participants. Dotted line shows multiple testing threshold across phenotypes and tissue types.

**Overall activity**

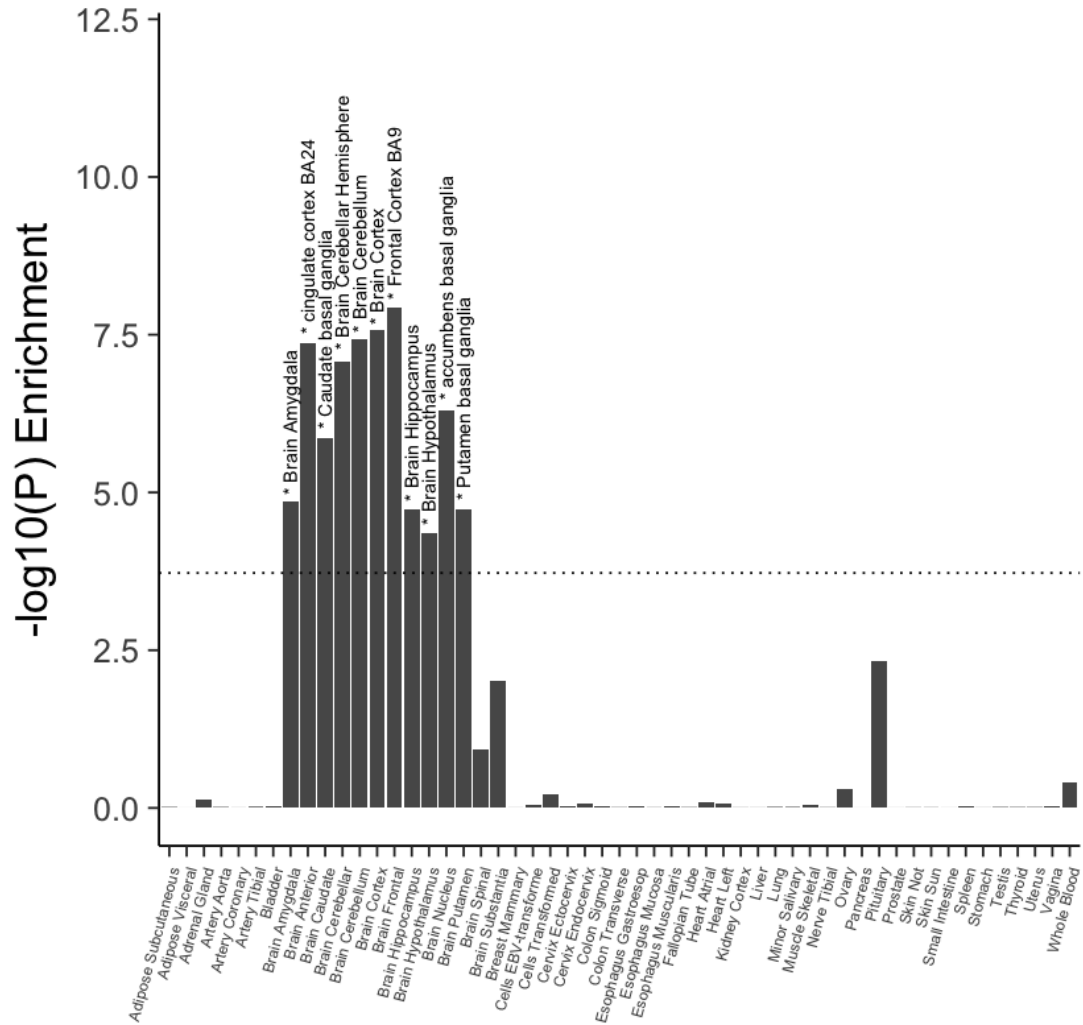



**Sleep duration**

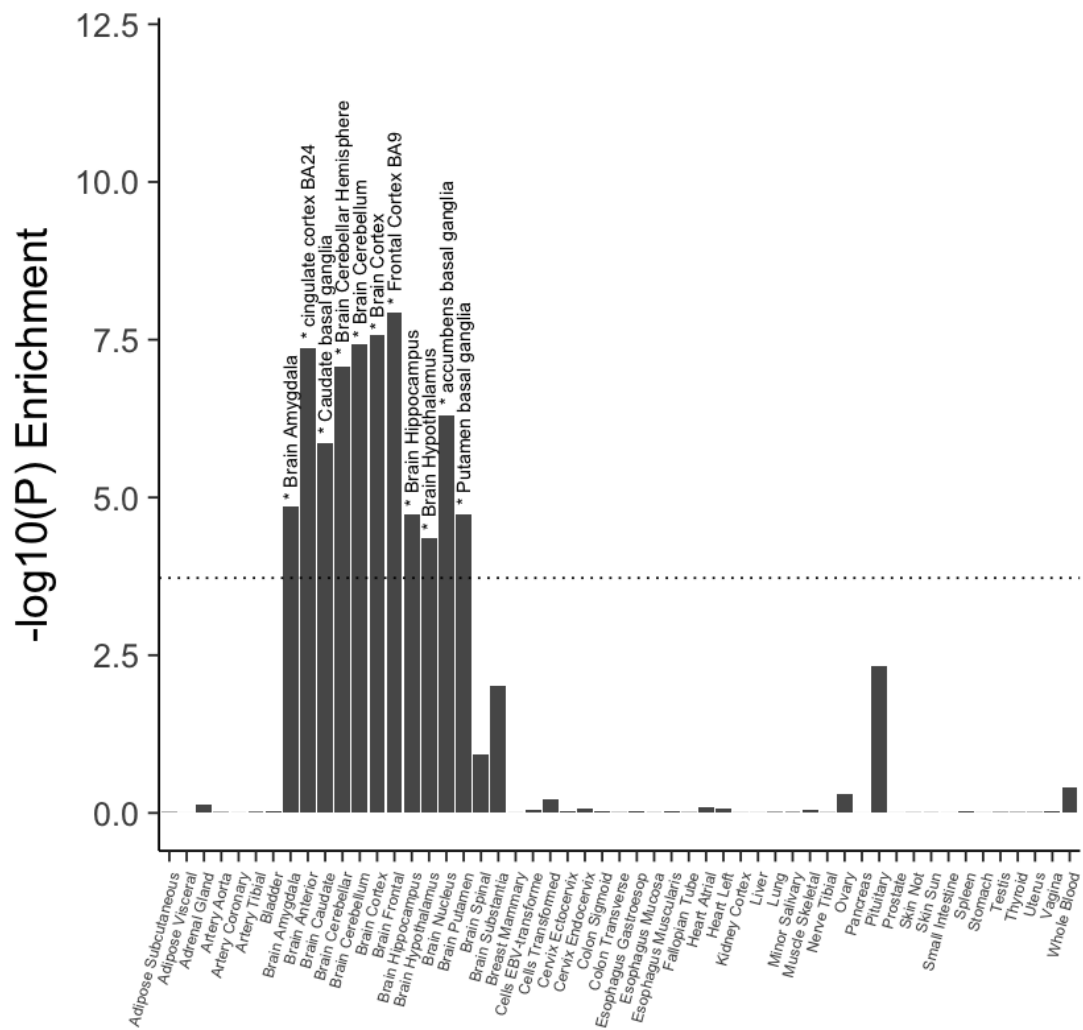

**Sedentary behaviour – no significant associations.**

**Walking – no significant associations.**

**Moderate activity – no significant associations.**

## Supplementary Figure 10 | Gene set enrichment analysis of accelerometer-measured physical activity and sleep duration traits with other diseases.

### Overall activity

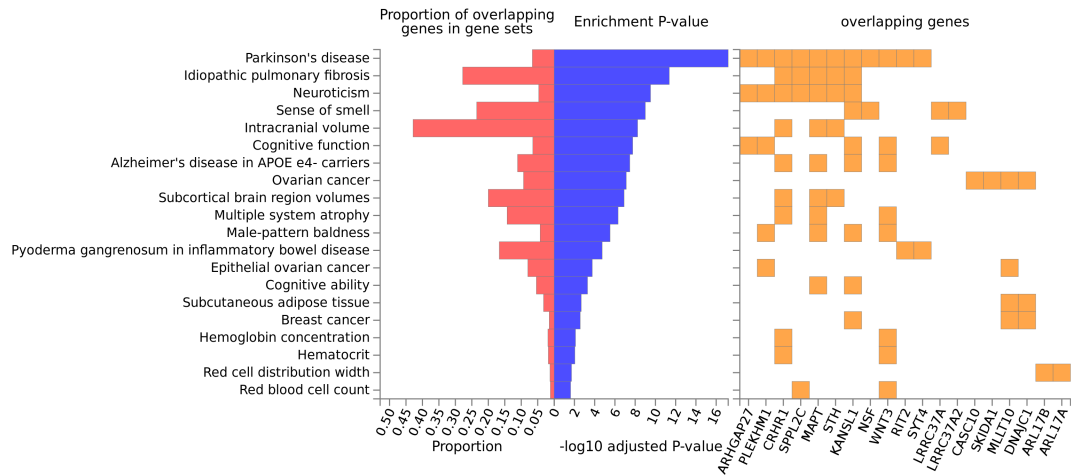

### Sleep duration

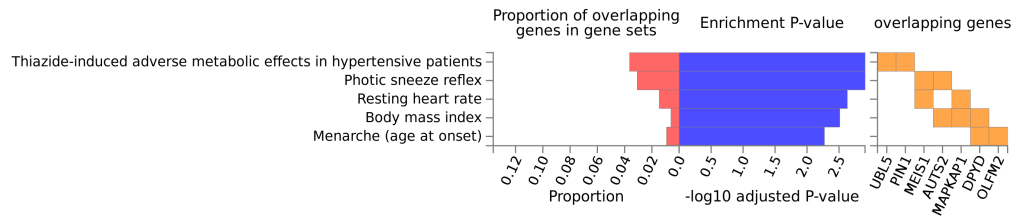

### Sedentary

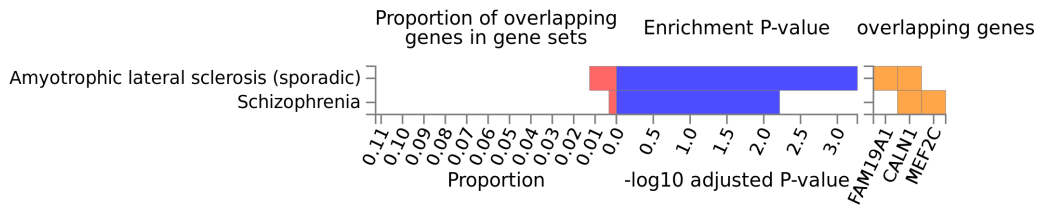

Walking – no significant loci on which to conduct analysis.

Moderate – no significant loci on which to conduct analysis.

**Supplementary Figure 11** | Distribution of groundtruth activity states in training dataset (n=153) and predicted labels in UK Biobank accelerometer dataset (n=91,105).

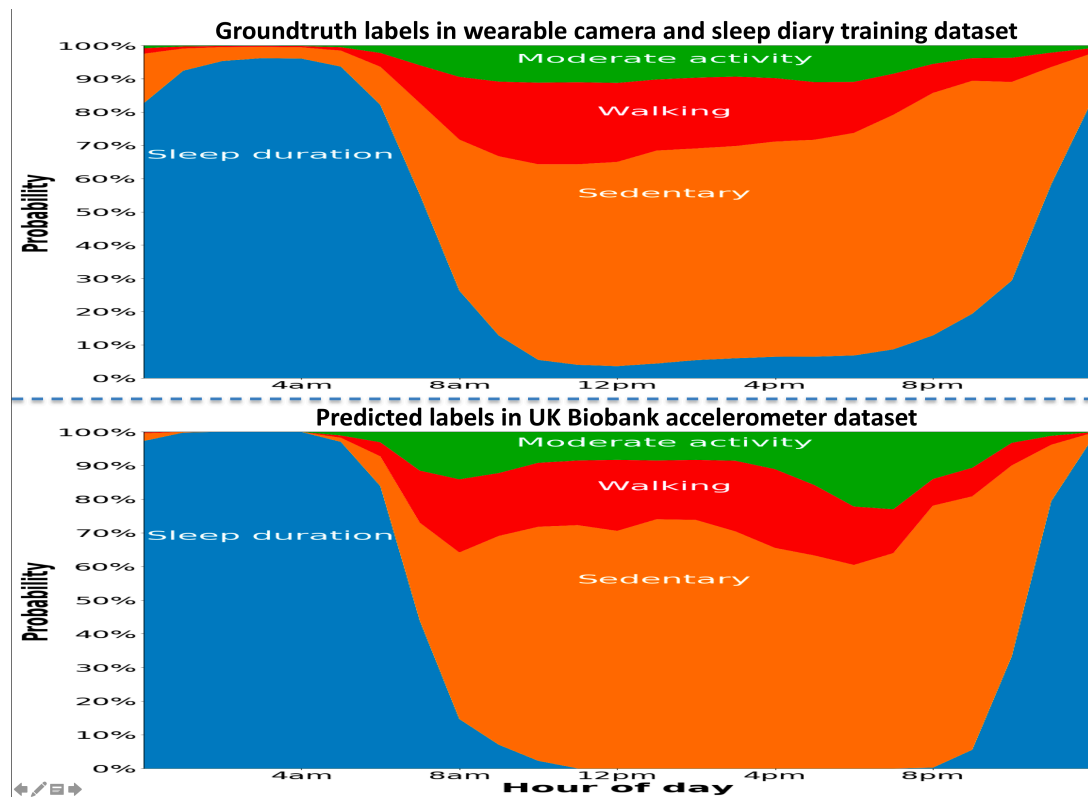

**Supplementary Table 1** | Percentage of machine-learned physical activity behaviours and sleep duration automatically classified from wrist-worn accelerometer data.

*Confusion matrix after leave-one-out validation on 188,355 labelled minutes of human activity in free-living environments: the CAPTURE-24 and ENERGY-24 studies 2014-2015 (n=153).*

| Prediction→<br>Ground truth↓ | Sleep duration | Sedentary | Tasks-light | Walking | Moderate activity |
|------------------------------|----------------|-----------|-------------|---------|-------------------|
| <b>Sleep</b>                 | 91%            | 8%        | <1%         | <1%     | <1%               |
| <b>Sedentary</b>             | 6%             | 81%       | 5%          | 3%      | 6%                |
| <b>Tasks-light</b>           | <1%            | 29%       | 25%         | 20%     | 26%               |
| <b>Walking</b>               | <1%            | 11%       | 15%         | 58%     | 16%               |
| <b>Moderate</b>              | <1%            | 12%       | 14%         | 15%     | 58%               |

**Kappa agreement score = 0.68**

**Overall classification accuracy = 79%**

**Raw data for each 30-sec time window**

| Prediction→<br>Ground truth↓ | Sleep duration | Sedentary | Tasks-light | Walking | Moderate activity |
|------------------------------|----------------|-----------|-------------|---------|-------------------|
| <b>Sleep</b>                 | 154,099        | 12,985    | 652         | 427     | 358               |
| <b>Sedentary</b>             | 6,782          | 97,899    | 6,230       | 3,576   | 6,938             |
| <b>Tasks-light</b>           | 95             | 6,590     | 5,693       | 4,469   | 6,004             |
| <b>Walking</b>               | 122            | 3,624     | 4,731       | 18,548  | 4,984             |
| <b>Moderate</b>              | 94             | 2,682     | 3,153       | 3,311   | 12,664            |

**Supplementary Table 2** | Fine-mapping of accelerometer measured physical activity and sleep duration loci in 91,105 UK Biobank participants.

| TRAIT            | LOCUS | CHR | SNP         | P        | # SNPs | # SNPS PREDICTED CAUSAL | # SNPS PLAUSIBLE CAUSAL | PLAUSIBLE SNPS DIST (KB) | MOST LIKELY CAUSAL SNP (PROB) | NEAREST GENE | DIST 2 ASSOC SNP (KB) |
|------------------|-------|-----|-------------|----------|--------|-------------------------|-------------------------|--------------------------|-------------------------------|--------------|-----------------------|
| Overall activity | 1     | 10  | rs564819152 | 4.20E-09 | 4903   | 3                       | 10                      | 909.4                    | rs12247677 (0.97)             | MIR4675      | 875.1                 |
| Overall activity | 8     | 17  | rs2696625   | 3.20E-12 | 6308   | -                       | -                       | -                        | -                             | -            | -                     |
| Overall activity | 9     | 18  | rs59499656  | 1.90E-09 | 6027   | 1                       | 6                       | 59.1                     | rs59499656 (0.24)             | SYT4         | 0                     |
| Sleep duration   | 2     | 9   | rs2416963   | 2.30E-10 | 4345   | 1                       | 4                       | 999.5                    | rs10819164 (0.08)             | MVB12B       | 995.3                 |
| Sleep duration   | 3     | 7   | rs2006810   | 3.90E-09 | 5967   | 1                       | 5                       | 50                       | rs2006810 (0.54)              | AUTS2        | 0                     |
| Sleep duration   | 8     | 17  | rs7502280   | 8.80E-11 | 6554   | -                       | -                       | -                        | -                             | -            | -                     |
| Sleep duration   | 10    | 2   | rs62158170  | 5.80E-20 | 5662   | 1                       | 6                       | 5.4                      | rs62158170 (0.40)             | PAX8-AS1     | 0                     |
| Sleep duration   | 11    | 2   | rs113851554 | 3.10E-18 | 6813   | 1                       | 1                       | 0                        | rs113851554 (1.00)            | MEIS1        | 0                     |
| Sleep duration   | 12    | 6   | rs72828533  | 2.70E-13 | 8358   | 1                       | 15                      | 105.1                    | rs7765476 (0.11)              | LOC101928519 | 3.8                   |
| Sleep duration   | 13    | 19  | rs2303100   | 1.40E-10 | 6880   | 1                       | 11                      | 58.4                     | rs2303100 (0.11)              | OLFM2        | 0                     |
| Sleep duration   | 14    | 1   | rs75641275  | 2.20E-10 | 5759   | 1                       | 4                       | 235.1                    | rs75641275 (0.05)             | DPYD         | 0                     |
| Sedentary        | 4     | 5   | rs26579     | 2.60E-09 | 4198   | 1                       | 7                       | 12.3                     | rs26579 (0.09)                | MEF2C-AS2    | 0                     |
| Sedentary        | 5     | 5   | rs25981     | 3.00E-09 | 6395   | 1                       | 9                       | 23.7                     | rs25981 (0.26)                | EFNA5        | 0                     |
| Sedentary        | 6     | 3   | rs1858242   | 3.10E-09 | 6434   | 1                       | 13                      | 270.6                    | rs1858242 (0.19)              | LOC105377146 | 0                     |
| Sedentary        | 7     | 7   | rs34858520  | 4.20E-09 | 5491   | 1                       | 0                       | -                        | -                             | -            | -                     |

## Supplementary Note 1 | Physical activity and sleep duration, and their relationship with other traits

While physical activity and sleep duration are established risk factors for multiple diseases from observational epidemiology, the extent to which their underlying genetic architectures are shared with disease phenotypes is unknown<sup>4</sup>. First, we tested for genome-wide genetic correlations between our traits and those from publicly-available GWAS data in 832 phenotypes using LD score regression<sup>15</sup> on the LD-Hub web resource<sup>27</sup>. After adjusting for multiple testing ( $p < 1.2 \times 10^{-5}$ , accounting for 5 accelerometer phenotypes and 832 comparison traits), we found the movement phenotypes to correlate with 155 independent traits (**Supplementary Data 5**). In general, increases in overall activity and walking phenotypes were genetically correlated with improved health status in phenotypes relating to: BMI ( $r_g = -0.35$ ,  $p = 2.8 \times 10^{-58}$ ), body fat percentage ( $r_g = -0.43$ ,  $p = 6.2 \times 10^{-102}$ ), diabetes ( $r_g = -0.35$ ,  $p = 2.2 \times 10^{-25}$ ), cardiovascular disease (e.g. for myocardial infarction  $r_g = -0.25$ ,  $p = 8.4 \times 10^{-7}$ ), back-pain ( $r_g = -0.17$ ,  $p = 4.5 \times 10^{-6}$ ), hypertension ( $r_g = -0.24$ ,  $p = 1.8 \times 10^{-20}$ ), and HDL cholesterol ( $r_g = 0.26$ ,  $p = 5.9 \times 10^{-12}$ ). Increases in sleep duration were genetically correlated with unfavourable status in phenotypes relating to: education (e.g. for age completed full time education  $r_g = -0.23$ ,  $p = 6.1 \times 10^{-12}$ ), fluid intelligence ( $r_g = -0.25$ ,  $p = 1.6 \times 10^{-15}$ ), and body fat percentage ( $r_g = 0.12$ ,  $p = 5.4 \times 10^{-6}$ ). Increases in sedentary time were genetically correlated with increased fluid intelligence score ( $r_g = 0.35$ ,  $p = 1.5 \times 10^{-24}$ ), but decreased health status (e.g. for body fat percentage  $r_g = 0.27$ ,  $p = 2.5 \times 10^{-23}$ ) (**Supplementary Data 5**).

To examine whether the genome-wide significant loci identified in our analysis affect other traits, we used the Oxford Brain Imaging Genetics Server<sup>25</sup> ([big.stats.ox.ac.uk](http://big.stats.ox.ac.uk)) to perform a phenome-wide association study (PheWAS) on almost 4,000 traits in UK Biobank participants. After adjusting for multiple testing ( $p < 1.25 \times 10^{-6}$ , accounting

for 10 loci and 4,000 traits), we identified associations with 74 independent traits (**Supplementary Data 6**). These included anthropometric traits (n=39), self-reported brain imaging traits (n=11), and exercise traits (n=10) (complete results in **Supplementary Data 6**). We also extracted previously reported GWAS associations within 400kb and  $r^2 > 0.2$  of accelerometer index SNPs from the NHGRI GWAS catalog<sup>26</sup>. Here, we identified 11 independent traits including cognitive and mental health outcomes (cognitive function, schizophrenia, autism, intelligence, and educational attainment) associated with accelerometer measured sleep duration (**Supplementary Data 7**).

**Supplementary Note 2 | Mendelian Randomization decision tree**

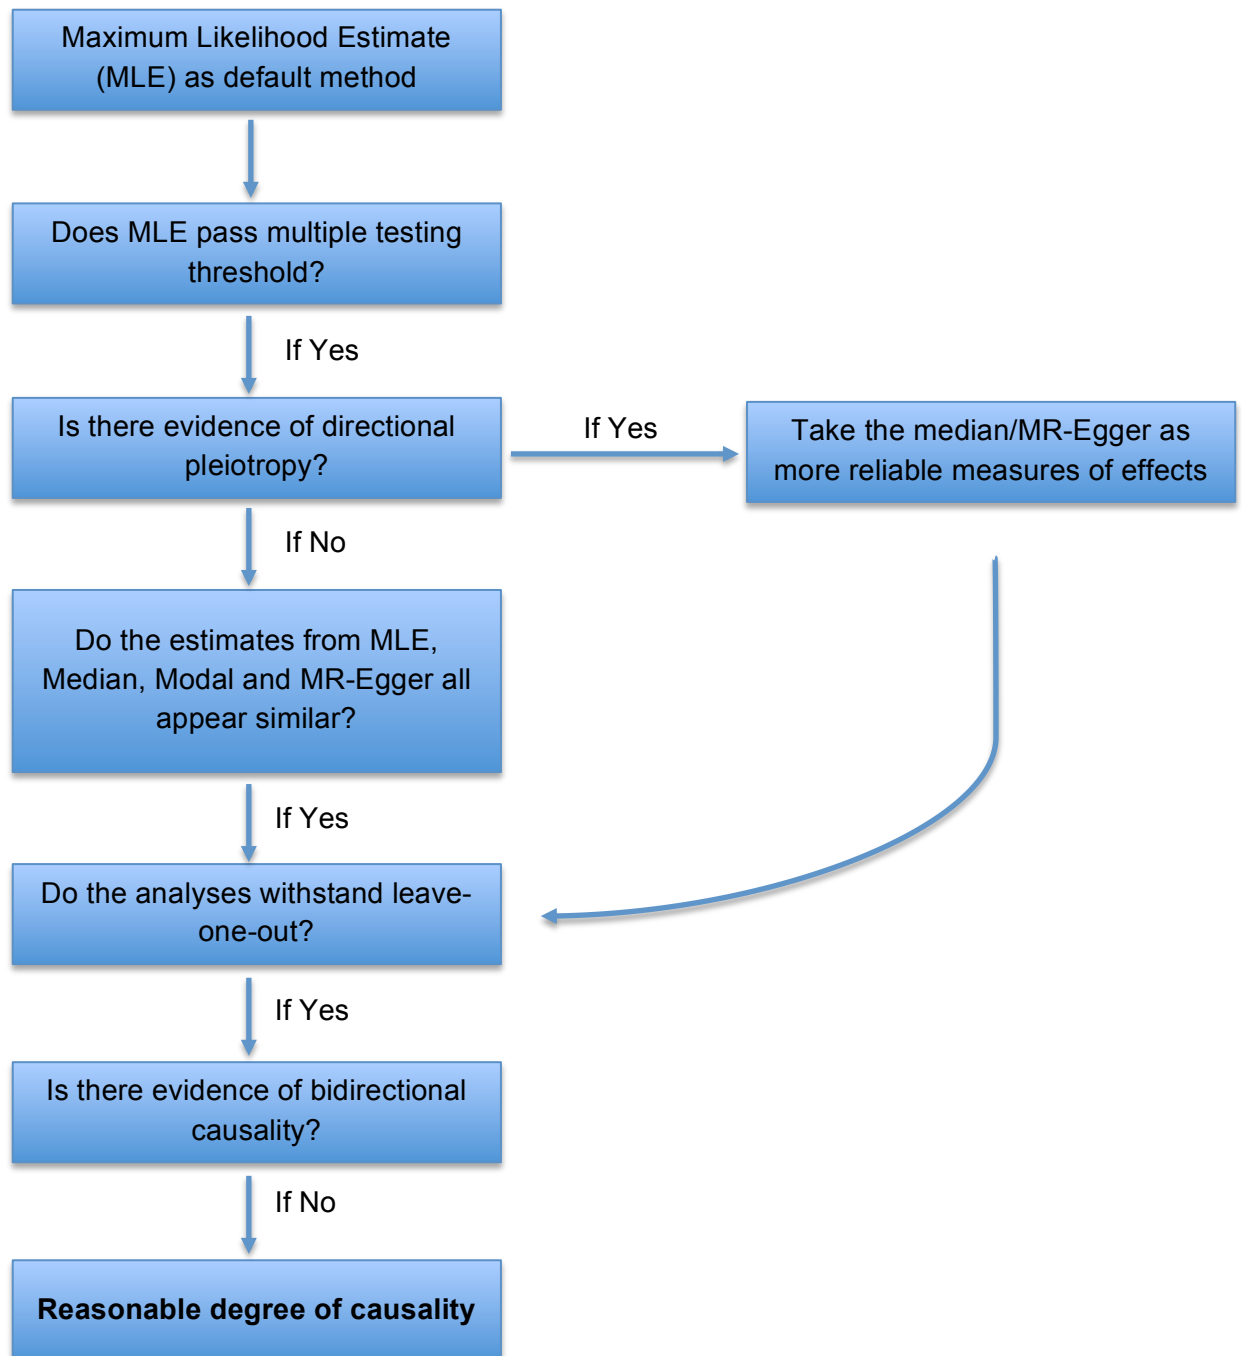

Supplement: 41467_2018_7743_MOESM1_ESM.pdf [file 41467_2018_7743_MOESM1_ESM.pdf]
