# Supplementary material for: GWAS identifies 14 loci for device-measured physical activity and sleep duration
Source: PubMed Central journal article supplement (PMC6288145; doi:10.1038/s41467-018-07743-4), 2018-12-10
Supplement: 41467_2018_7743_MOESM3_ESM.pdf [file 41467_2018_7743_MOESM3_ESM.pdf]

**Supplementary Data 1** | Phenotypes mapped from original image annotation and compendium of physical activities codes.

**Supplementary Data 2** | Other suggestive ( $5 \times 10^{-8}$ ) loci associated with accelerometer-measured physical activity and sleep duration traits in 91,105 UK Biobank participants. *Beta and SE are in standard deviation units.*

**Supplementary Data 3** | Results in this UK Biobank accelerometer cohort for genetic variants previously reported to be associated with traits related to physical activity and sleep duration in UK Biobank and other datasets. *Significant associations ( $p < 2.3 \times 10^{-4}$ , accounting for 213 candidate loci) are highlighted in green. Beta and SE are in standard deviation units.*

**Supplementary Data 4** | Significant genes associated with accelerometer-measured physical activity and sleep duration traits in 91,105 UK Biobank participants. *This is based on gene-based analysis by MAGMA integrated in FUMA where input SNPs were mapped by position to 18,232 protein-coding genes. Significant associations ( $p < 5.48 \times 10^{-7}$ , accounting for 18,232-genes and 5 traits) did not find additional loci to those already identified in the SNP association analysis.*

**Supplementary Data 5** | Significant genetic correlations for accelerometer-measured physical activity and sleep duration in 91,105 UK Biobank participants with other traits and diseases using LD score regression on the LD-Hub web resource.

**Supplementary Data 6** | PheWAS results at  $P < 1.25 \times 10^{-6}$  for genome-wide significant accelerometer measured physical activity and sleep duration loci in 91,105 UK Biobank participants.

**Supplementary Data 7** | Reported associations of objectively measured physical activity and sleep duration SNPs identified in 91,105 UK Biobank participants with traits in the NHGRI GWAS catalog.

**Supplementary Data 8** | Mendelian Randomization analysis of accelerometer-measured physical activity and sleep duration, and their association with disease outcomes. *This includes data from UK Biobank participants who were not in the accelerometer discovery dataset and other GWAS datasets available on MR-Base. SE and beta are in exposure SD units.*

**Supplementary Data 9** | Meta analysis of Mendelian Randomization results for adiposity traits using GIANT and UK Biobank participants not in accelerometer discovery dataset. *SE and beta are in exposure SD units.*

**Supplementary Data 10** | Effect of instrument variable selection by GWAS discovery threshold on Mendelian Randomization analysis outcomes. *Beta and SE are in exposure SD units.*

**Supplementary Data 11** | Directionality, horizontal pleiotropy, and confounding sensitivity analyses for Mendelian Randomization associations suggesting evidence of causality from Supplementary Data 8, 9, and 10.

**Supplementary Data 12** | Mendelian randomization bi-directional (and associated sensitivity) tests for traits suggesting evidence of causality.
